# Supplementary material for: Cellular Architecture Mediates DivIVA Ultrastructure and Regulates Min Activity in Bacillus subtilis
Source: PubMed Central journal article supplement — mBio. 2011 Nov 22;2(6):e00257-11. doi: 10.1128/mBio.00257-11 (PMC3225972; doi:10.1128/mbio.00257-11), 2011-11-22

## SUPPLEMENTAL MATERIAL

### Cellular architecture mediates the ultrastructure and function of DivIVA in *Bacillus subtilis*

Prahathees Eswaramoorthy<sup>a</sup>, Marcella L. Erbb, James A. Gregory<sup>b</sup>, Jared Silverman<sup>c</sup>, Kit Pogliano<sup>b</sup>, Joe Pogliano<sup>b</sup>, Kumaran S. Ramamurthia

<sup>a</sup>Laboratory of Molecular Biology, National Cancer Institute, National Institutes of Health, Bethesda, MD 20892, USA;

<sup>b</sup>Division of Biological Sciences, University of California at San Diego, La Jolla, CA 92093, USA;

<sup>c</sup>Cubist Pharmaceuticals, 65 Hayden Avenue, Lexington MA 02421, USA

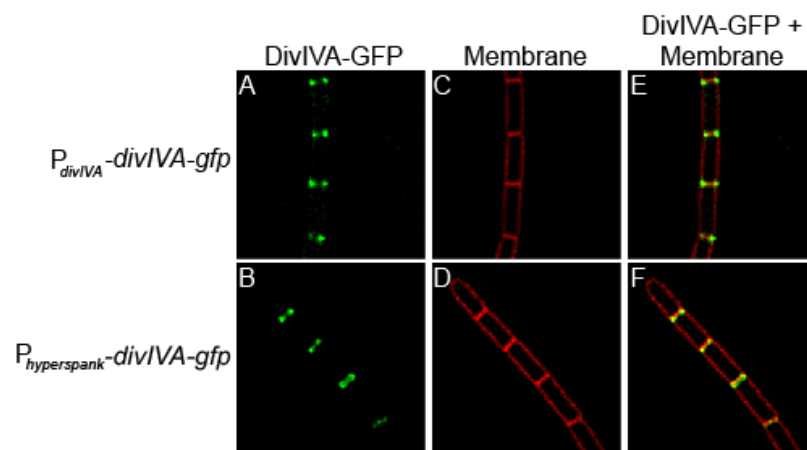

Supplement: mbo006111198sf01.pdf [file mbo006111198sf01.pdf]
